# Supplementary material
Source: PubMed Central journal article supplement (PMC8363272)
Supplement: jci-131-148979-s160.pdf [file jci-131-148979-s160.pdf]

## **Material and Method**

**Antibodies:** The information of antibodies and cell dyes used in this study are shown in the **Supplementary Table 5**. The HLA-F-specific mAb, 4D11 was a generous gift from Dr. Dan Geraghty, Fred Hutchinson Cancer Research Institute, Seattle, WA.

**Generation of an HLA-E knockout 221 cell line and its HLA class I transductants:** Since HLA-E tetramers were unstable, a panel of 721.221 derivative cell lines were generated to discriminate between classical HLA- Ia and HLA-E restricted T-cell responses. The CRISPR/Cas9 system designed with the guide RNA (5'-cctCCTTTTACTCCTCTCGGAGGC-3') targeting the first exon of *HLA-E* was used to disrupt the *HLA-E* gene in 221 cells (Plasmid 42230, Addgene). An *HLA-E* knockout clone with loss-of-function heterozygous deletions by genotyping was isolated (221 $\Delta^E$ ). Individual HLA-Ia and HLA-E\*01 alleles were subsequently transduced into the HLA-E<sup>KO</sup> cells by using lentiviral plasmids encoding HLA-A\*02:01, HLA-E\*01:01 and HLA-E\*01:03, and HLA-B\*57:01, HLA-B\*57:03, and human CD4 co-receptor. Lentiviruses were produced by co-transfection of 293T cells with ViraPower Packaging Mix (ThermoFisher) using Lipofectamine (Invitrogen) and concentrated by centrifugation (100,000 x g for 2 hrs. at 4°C). Transduction was achieved by spinfection at 1,065 x g for 2hrs. and surface expression of the target gene by transduced cells monitored by immunostaining. Derivative lines expressing a single class Ia or class Ib allele were generated from 221 $\Delta^E$  cells (221 $\Delta^E$ .A\*02:01, 221 $\Delta^E$ .B\*57:01, 221 $\Delta^E$ .B\*57:03, 221 $\Delta^E$ .E\*01:01 and 221 $\Delta^E$ .E\*01:03). Additionally, four of these were rendered HIV permissive by the transduction of the T cell co-receptor CD4 (221 $\Delta^E$ .CD4, 221 $\Delta^E$ .B\*57:01.CD4, 221 $\Delta^E$ .E\*01.01.CD4 and 221 $\Delta^E$ .E\*01.03.CD4).

**Ex-vivo intracellular cytokine staining (ICS) based antigen sensitivity assay:** Untouched CD8

T cells were isolated from PBMCs of chronically HIV infected individuals with detectable antigen-specific CD8 T-cell response as measured by ex-vivo ELISpot assay. Cell lines, 721.221-AEH (HLA-E), K562-B\*57:01 (HLA-B57) as well as CD4.E01, CD4.E03 and CD4.B57 expressing cell lines were used as antigen presenting cells (APCs). APCs were pulsed with three log fold serial dilutions of peptide (10, 1 and 0.1 µg/ml) for 2 hrs. and washed three times before adding to the CD8 T cells at 1:1 ratio. Costimulatory molecules (anti-CD28 and CD49d), anti-CD107a-FITC antibodies and Monensin and Brefeldin-A (5 µg/ml, eBioscience) were added and the cells co-cultured for 12 hrs. Cytokine/effector molecules were detected using flow cytometry (IFN-γ, TNF-α, IL-2, CD107a, perforin and granzyme B) at 37°C/5% CO<sub>2</sub>. Following incubation, cells were stained with Dead cell dye-UV, anti-CD3-Alexa 780, anti-CD8-V500 and anti-CD19-Percp/CY5.5 at 4°C for 30 min. Cells were then fixed and permeabilized using Cytofix/Cytoperm and intracellularly stained with anti-IFNγ-Alexa 700, anti-IL2-APC, anti-TNFα-PECy7, anti-Perforin-PE, and anti-Granzyme B-V450 at 4°C for 30 min. Cells cultured in absence of peptide or in presence of SEB were served as negative or positive control respectively. At least 200,000 total events were acquired on an LSR II flow cytometer (BD Immunocytometry Systems), and data were analyzed using FlowJo (version 10.6.1, TreeStar Inc.).

**Supplemental Table 1. IFN- $\gamma$  ELISpot data showing recognition of overlapping Gag peptides (7954 and 7955) by CD8 T cells primed from two healthy donors.**

| Donor | OLP         | Location in Gag | OLP Sequence                                | Net SFCs /<br>10 <sup>6</sup> cells |
|-------|-------------|-----------------|---------------------------------------------|-------------------------------------|
| HD1   | <b>7912</b> | 161-175         | E K A F S P E V I P M F S A L               | 2,520                               |
|       | 7919        | 189-203         | N T V G G H Q A A M Q M L K E               | 280                                 |
|       | 7920        | 193-207         | G H Q A A M Q M L K E T I N E               | 120                                 |
|       | 7937        | 261-275         | I Y K R W I I L G L N K I V R               | 1,000                               |
|       | 7938        | 265-279         | W I I L G L N K I V R M Y S P               | 400                                 |
|       | <b>7954</b> | 329-343         | D C K T I L <b><u>K A L G P A A I L</u></b> | <b>12,840</b>                       |
|       | <b>7955</b> | 333-347         | I L <b><u>K A L G P A A I L</u></b> E E M M | <b>7,720</b>                        |
|       | 7978        | 425-439         | D C T E R Q A N F L G K I W P               | 400                                 |
|       | 7979        | 429-443         | R Q A N F L G K I W P S H K G               | 760                                 |
|       | 7980        | 433-447         | F L G K I W P S H K G R G P N               | 1,920                               |
| HD2   | 7879        | 29-43           | Y K L K H I V W A S R E L E R               | 25                                  |
|       | 7880        | 33-47           | H I V W A S R E L E R F A V N               | 27                                  |
|       | <b>7908</b> | 145-159         | Q A I S P R T L N A W V K V V               | 3,760                               |
|       | <b>7909</b> | 149-163         | P R T L N A W V K V V E E K A               | 2,760                               |
|       | 7910        | 153-167         | N A W V K V V E E K A K S P E               | 42                                  |
|       | 7911        | 157-171         | K V V E E K A K S P E V I P M               | 148                                 |
|       | 7916        | 177-191         | E G A T P Q D L N T M L N T V               | 30                                  |
|       | 7917        | 181-195         | P Q D L N T M L N T V G G H Q               | 499                                 |
|       | 7938        | 265-401         | W I I L G L N K I V R M Y S P               | 219                                 |
|       | 7939        | 269-283         | G L N K I V R M Y S P T S I L               | 456                                 |
|       | 7943        | 285-299         | I R Q G P K E P F R D Y V D R               | 20                                  |
|       | <b>7954</b> | 329-343         | D C K T I L <b><u>K A L G P A A I L</u></b> | <b>369</b>                          |
|       | <b>7955</b> | 333-347         | I L <b><u>K A L G P A A I L</u></b> E E M M | <b>175</b>                          |
|       | 7985        | 453-467         | P E P T A P P E E S F R F G E               | 565                                 |

*OLP= overlapping peptide; HD= healthy donor; KL9 epitope and its response is bolded and underlined; data are representative of at least two independent experiments. HD=healthy donor; HLA of HD1 is A0101/A0201; B3905/B5701 and HD2 is A0201/A68; B51/B58*

**Supplementary Table 2. HLA-I and clinical characteristics of chronically HIV-infected (CHI) individuals used in this study.**

| <b>PID*</b> | <b>HLA-A and -B genotype</b> |              |         |         | <b>HLA-E genotype</b> | <b>CD4 (cells/<math>\mu</math>L)</b> | <b>VL (copies/<math>\mu</math>L)</b> | <b>ART</b> |
|-------------|------------------------------|--------------|---------|---------|-----------------------|--------------------------------------|--------------------------------------|------------|
| CHI-2*      | A*02:01                      | A*02:01      | B*35:01 | B*57:03 | E*01:03, E*01:03      | 854                                  | 49                                   | Naïve      |
| CHI-4       | A*30:01                      | A*68:02      | B*42:01 | B*57:03 | E*01:03, E*01:03      | 930                                  | 208                                  | Naïve      |
| CHI-5       | A*30:01                      | A*66:01      | B*42:01 | B*57:03 | E*01:03, E*01:03      | 409                                  | 280                                  | Yes        |
| CHI-6       | A*30:01                      | A*30:02      | B*15:16 | B*57:03 | E*01:01, E*01:03      | 992                                  | 12,407                               | Yes        |
| CHI-7       | A*29:02                      | A*30:01      | B*15:01 | B*57:02 | E*01:01, E*01:03      | 167                                  | 1,680                                | Yes        |
| CHI-9*      | A*24:02                      | A*30:01      | B*53:01 | B*57:03 | E*01:03, E*01:03      | 885                                  | 613                                  | Yes        |
| CHI-10      | A*02:01                      | A*03:01      | B*07:02 | B*15:01 | E*01:01, E*01:03      | 291                                  | 176                                  | Yes        |
| CHI-11      | A*30:02                      | A*33:01      | B*57:03 | B*78:01 | E*01:01, E*01:01      | 1049                                 | 167                                  | Yes        |
| CHI-12*     | A*02:02                      | A*03:01      | B*56:01 | B*57:03 | E*01:01, E*01:03      | 1241                                 | 398                                  | Yes        |
| CHI-13      | A*03                         | A*03         | B*14    | B*57    | E*01:01, E*01:03      | 943                                  | 420                                  | Naïve      |
| CHI-14      | A*68                         | A*80:01      | B*40    | B*57:01 | E*01:01, E*01:03      | 693                                  | 226                                  | Naive      |
| CHI-15      | A*02:01                      | A*30:01      | B*13:02 | B*57:01 | E*01:01, E*01:01      | 551                                  | 47                                   | Yes        |
| CHI-16      | A*03:01                      | A*68:01      | B*51:01 | B*57:01 | E*01:03, E*01:03      | 403                                  | 74                                   | Yes        |
| CHI-17      | A*01:01                      | A*02:05      | B*49:01 | B*57:01 | E*01:01, E*01:01      | 520                                  | 2,950                                | No         |
| CHI-18      | A*02                         | A*30         | B*49    | B*57    | E*01:03, E*01:03      | 420                                  | 38,425                               | Yes        |
| CHI-19      | A*02:01                      | A*02:01      | B*40:02 | B*57:01 | E*01:03, E*01:03      | 818                                  | 456                                  | Naïve      |
| CHI-20      | A*02:01                      | A*30:01      | B*08:01 | B*57:02 | E*01:01, E*01:03      | 1763                                 | 19                                   | Naïve      |
| CHI-21      | A*01:01                      | A*02(01, 09) | B*44:02 | B*57:03 | E*01:01, E*01:03      | 511                                  | 1665                                 | Naive      |
| CHI-23*     | A*02:01                      | A*30:10      | B*07:02 | B*57:01 | E*01:01, E*01:01      | 587                                  | 1250                                 | No         |
| CHI-25*     | A*68:02                      | A*68:02      | B*57:03 | B*57:03 | E*01:01, E*01:03      | 572                                  | 1477                                 | Naïve      |

\* used in both *in-vitro* and *ex-vivo* assays

**Supplementary Table 3. Detection of HLA-E\*01 restricted KL9 and KF11 specific CD8 T cells in chronically HIV-infected individuals.**

| PID                              | % Specific Degranulation (% Nonspecific Degranulation) |                   |                    |                     |                     |
|----------------------------------|--------------------------------------------------------|-------------------|--------------------|---------------------|---------------------|
|                                  | KL9 Restricted by                                      |                   |                    | KF11 Restricted by  |                     |
|                                  | A*02:01                                                | B*57              | E*01               | B*57                | E*01                |
| CHI-2                            | -                                                      | <b>7.2 (2.2)</b>  | 3.4 (2.2)          | <b>34.6 (1.2)</b>   | <b>20.9 (1.5)*</b>  |
| CHI-4                            | -                                                      | 6.8 (4.9)         | 4.1 (3.4)          | <b>37.0 (5.4)</b>   | <b>16.5 (3.5)*</b>  |
| CHI-5                            | -                                                      | 3.3 (2.8)         | 1.8 (1.9)          | <b>9.6 (2.8)</b>    | 1.7 (1.9)           |
| CHI-6                            | -                                                      | 2.2 (1.4)         | 0.8 (1.3)          | <b>28.0 (1.4)**</b> | <b>18.8 (1.3)**</b> |
| CHI-7                            | -                                                      | 6.7 (2.9)*        | <b>32.4 (1.2)*</b> | 1.0 (2.9)           | 0.2 (2.6)           |
| CHI-9                            | -                                                      | 2.3 (0.2)*        | 1.6 (0.4)*         | <b>28.6 (5.0)</b>   | <b>17.5 (5.5)</b>   |
| CHI-10                           | <b>19.9 (2.3)*</b>                                     | -                 | <b>21.6 (2.8)*</b> | -                   | -                   |
| CHI-11                           | -                                                      | 9.3 (7.9)         | 11.1 (8.4)         | 17.8 (7.9)          | 10.4 (8.4)          |
| CHI-12                           | -                                                      | -                 | -                  | <b>30.1 (0.2)</b>   | <b>30.0 (0.4)*</b>  |
| CHI-13                           | -                                                      | 12.0 (11)         | 8.6 (6.2)          | <b>68.8 (11.0)</b>  | 8.9 (6.2)           |
| CHI-14                           | -                                                      | 2.1 (11.4)        | 7.9 (9.5)          | 28.1 (11.0)         | 9.3 (9.5)           |
| CHI-15                           | -                                                      | -                 | -                  | 20.6 (8.0)          | 14.9 (12.0)         |
| CHI-16                           | -                                                      | 1.3 (1.2)         | 1.3 (1.2)          | <b>64.5 (1.2)</b>   | <b>11.9 (1.2)</b>   |
| CHI-17                           | -                                                      | 1.5 (1.2)*        | 1.7 (1.4)*         | 3.4 (1.2)           | <b>13.7 (1.4)</b>   |
| CHI-18                           | -                                                      | 2.4 (2.2)         | 3.1 (3.5)          | 3.0 (2.2)           | <b>11.6 (3.5)</b>   |
| CHI-19                           | -                                                      | 5.2 (4.1)         | 5.3 (5.6)          | <b>26.6 (4.1)</b>   | 11.8 (5.6)          |
| CHI-20                           | -                                                      | 6.4 (5.0)         | 5.0 (6.5)          | 4.8 (5.0)           | 5.6 (6.5)           |
| CHI-21                           | -                                                      | <b>25.5 (1.2)</b> | 0.5 (0.4)          | <b>14.4 (1.2)</b>   | 0.4 (0.4)           |
| CHI-23                           | -                                                      | 11.9 (4.9)        | 6.5 (4.4)          | 14.0 (5.4)          | 6.5 (4.4)           |
| CHI-25                           | -                                                      | -                 | -                  | <b>29.0 (7.8)</b>   | <b>31.0 (5.07)</b>  |
| <b># Positive<br/>/ # Tested</b> | <b>1/1</b>                                             | <b>2/16</b>       | <b>2/17</b>        | <b>11/19</b>        | <b>9/19</b>         |

\*Representative results from two independent experiments using different PBMC aliquots

\*\*Representative results from three experiments. Bolded= positive based on 3 times the background

**Supplementary Table 4. Functionality of CD8 T cells stimulated ex-vivo with antigen presenting cells expressing HLA-E or B57**

| PTID | APC | peptide | IFN $\gamma$ | IL2   | CD107 plus   |          |           |
|------|-----|---------|--------------|-------|--------------|----------|-----------|
|      |     |         |              |       | TNF $\alpha$ | Perforin | GranzymeB |
| P1   | AEH | Media   | 0.1          | 0     | 0.16         | 0.066    | 0.016     |
|      | AEH | KF11    | 1.11         | 0.006 | 0.81         | 0.23     | 0.019     |
|      | AEH | KL9     | 0.085        | 0     | 0.15         | 0.077    | 0.017     |
|      | B57 | Media   | 0            | 0     | 0            | 0.003    | 0.003     |
|      | B57 | KF11    | 0.32         | 0.003 | 0.25         | 0.019    | 0.003     |
|      | B57 | KL9     | 0.028        | 0     | 0.038        | 0.041    | 0.01      |
| P2   | AEH | Media   | 0.17         | 0.001 | 0.17         | 0.092    | 0.064     |
|      | AEH | KF11    | 0.74         | 0.001 | 0.29         | 0.18     | 0.078     |
|      | AEH | KL9     | 0.21         | 0     | 0.19         | 0.12     | 0.072     |
|      | B57 | Media   | 0.004        | 0     | 0.011        | 0.02     | 0.012     |
|      | B57 | KF11    | 0.097        | 0     | 0.055        | 0.036    | 0.021     |
|      | B57 | KL9     | 0.13         | 0.003 | 0.064        | 0.043    | 0.026     |
| P3   | AEH | Media   | 0.012        | 0     | 0.026        | 0.038    | 0.014     |
|      | AEH | KF11    | 0.18         | 0     | 0.088        | 0.09     | 0.028     |
|      | AEH | KL9     | 0.012        | 0     | 0.032        | 0.037    | 0.022     |
|      | B57 | Media   | 0            | 0     | 0            | 0.002    | 0.002     |
|      | B57 | KF11    | 0.008        | 0     | 0            | 0.006    | 0.003     |
|      | B57 | KL9     | 0.017        | 0.003 | 0.015        | 0.015    | 0.015     |
| P4   | AEH | Media   | 0.004        | 0     | 0            | 0.006    | 0.009     |
|      | AEH | KF11    | 0.07         | 0.002 | 0.037        | 0.016    | 0.016     |
|      | AEH | KL9     | 0.006        | 0     | 0.004        | 0.008    | 0.014     |
|      | B57 | Media   | 0            | 0     | 0            | 0        | 0.005     |
|      | B57 | KF11    | 0.028        | 0     | 0.02         | 0.002    | 0.004     |
|      | B57 | KL9     | 0.007        | 0     | 0.002        | 0.002    | 0.005     |
| P5   | AEH | Media   | 0.06         | 0     | 0.072        | 0.13     | 0.019     |
|      | AEH | KF11    | 0.98         | 0     | 0.64         | 0.59     | 0.06      |
|      | B57 | Media   | 0.005        | 0     | 0.005        | 0.01     | 0.002     |
|      | B57 | KF11    | 0.14         | 0     | 0.095        | 0.1      | 0.021     |
| P6   | AEH | Media   | 0.11         | 0     | 0.19         | 0.22     | 0.078     |
|      | AEH | KF11    | 2.13         | 0.002 | 2.04         | 1.4      | 0.28      |
|      | AEH | KL9     | 0.14         | 0     | 0.19         | 0.22     | 0.049     |
|      | B57 | Media   | 0.002        | 0     | 0.005        | 0.039    | 0.025     |
|      | B57 | KF11    | 0.039        | 0     | 0.041        | 0.058    | 0.02      |
|      | B57 | KL9     | 0.3          | 0     | 0.32         | 0.16     | 0.11      |
| P7   | AEH | Media   | 0.024        | 0.001 | 0.039        | 0.027    | 0.01      |
|      | AEH | KF11    | 0.65         | 0.011 | 0.51         | 0.078    | 0.01      |
|      | B57 | Media   | 0.015        | 0     | 0.023        | 0.017    | 0.002     |
|      | B57 | KF11    | 0.17         | 0     | 0.16         | 0.043    | 0.002     |
|      | AEH | Media   | 0.012        | 0.002 | 0.022        | 0.032    | 0.015     |
|      | AEH | KL9     | 0.021        | 0     | 0.026        | 0.038    | 0.023     |
|      | B57 | Media   | 0.014        | 0.005 | 0.017        | 0.045    | 0.024     |
|      | B57 | KL9     | 0.24         | 0.003 | 0.14         | 0.069    | 0.013     |
| P8   | AEH | Media   | 0.088        | 0     | 0.089        | 0.22     | 0.12      |
|      | AEH | KF11    | 3.11         | 0     | 1.36         | 2.89     | 0.8       |
|      | AEH | KL9     | 0.091        | 0     | 0.062        | 0.21     | 0.13      |
|      | B57 | Media   | 0.002        | 0.002 | 0.009        | 0.009    | 0.017     |
|      | B57 | KF11    | 0.36         | 0     | 0.23         | 0.33     | 0.16      |
|      | B57 | KL9     | 0.088        | 0     | 0.034        | 0.11     | 0.088     |
| P9   | AEH | Media   | 0.097        | 0     | 0.17         | 0.065    | 0.047     |
|      | AEH | KF11    | 0.39         | 0.002 | 0.39         | 0.083    | 0.034     |
|      | AEH | KL9     | 0.14         | 0     | 0.22         | 0.073    | 0.056     |
|      | B57 | Media   | 0.005        | 0     | 0.005        | 0.002    | 0.002     |
|      | B57 | KF11    | 0.073        | 0.003 | 0.064        | 0.005    | 0.007     |
|      | B57 | KL9     | 0.12         | 0     | 0.15         | 0.022    | 0.017     |

**Supplementary Table 5. List of antibodies used in this study.**

| <b>Marker</b> | <b>Fluorochrome</b>  | <b>Supplier</b> | <b>Cat. #</b> | <b>Clone</b> |
|---------------|----------------------|-----------------|---------------|--------------|
| CD8           | PE                   | BD Biosciences  | 557086        | RPA-T8       |
| CD8           | V500                 | BD Biosciences  | 560774        | RPA-T8       |
| CD8           | FITC                 | BD Biosciences  | 561947        | RPA-T8       |
| CD4           | FITC                 | BD Biosciences  | 561005        | RPA-T4       |
| CD19          | Percp-Cy 5.5         | BD Biosciences  | 561295        | HIB19        |
| CD69          | APC                  | BD Biosciences  | 555533        | FN50         |
| CD137         | PE                   | BD Biosciences  | 555956        | 4B4-1        |
| IFN- $\gamma$ | ALEXA 700            | BD Biosciences  | 557995        | B27          |
| IFN- $\gamma$ | V500                 | BD Biosciences  | 561980        | B27          |
| IL-2          | APC                  | BD Biosciences  | 555434        | M-A251       |
| IL-2          | Percp-Cy 5.5         | BD Biosciences  | 560503        | M-A251       |
| TNF- $\alpha$ | PE-Cy7               | BD Biosciences  | 557647        | MAb11        |
| CD107a        | FITC                 | BD Biosciences  | 555800        | H4A3         |
| CD107b        | FITC                 | BD Biosciences  | 555804        | H4B4         |
| Granzyme B    | V450                 | BD Biosciences  | 561151        | GB11         |
| Granzyme B    | Alexa 647            | BD Biosciences  | 561999        | GB11         |
| MIP-1 $\beta$ | PE                   | BD Biosciences  | 550078        | D21-1351     |
| CD3           | APC-eFluor 780       | eBioscience     | 47-0032-82    | 17A2         |
| HLA-E         | APC                  | eBioscience     | 17-9953-41    | 3D12         |
| HLA-A2        | APC                  | eBioscience     | 17-9876-42    | BB7.2        |
| CD19          | APC                  | eBioscience     | 47-0199-42    | HIB19        |
| TNF-a         | Alexa700             | eBioscience     | 56-7349-42    | MAb11        |
| CD94          | APC                  | eBioscience     | 17-5094-42    | HP-3D9       |
| NKG2D         | PE-Cy7               | eBioscience     | 14-5878-82    | 1D11         |
| NKG2C         | PerCp-e Fluor 710    | eBioscience     | 46-5896-82    | 20D5         |
| Perforin      | PE                   | cell sciences   | CDM247        | B-D48        |
| Dead cell dye | blue dead cell stain | Invitrogen      | -             | L23105       |
| Dead cell dye | aqua dead cell stain | Invitrogen      | -             | L34977       |

## Supplementary Figure 1

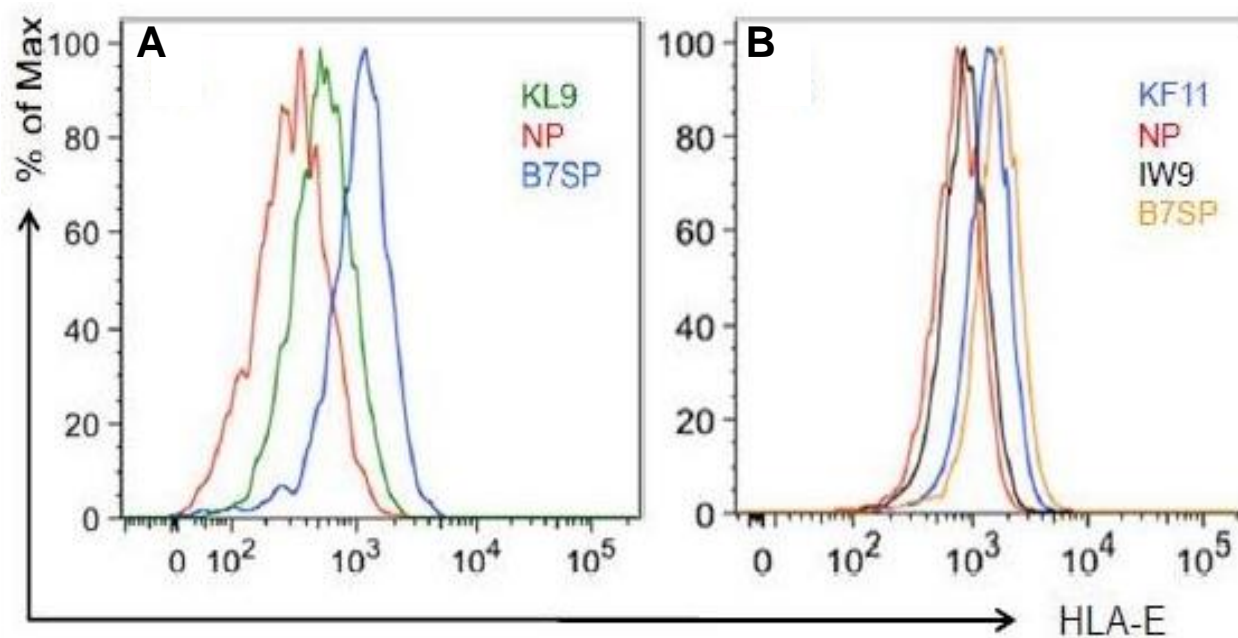

**Supplementary Figure 1. Binding of KL9 and KF11 to HLA-E\*01:01 expressed on 721.221 cells.** The histogram of cells incubated with an isotype control IgG1 $\kappa$  was essentially identical to that of cells incubated without peptide (NP) or with 100  $\mu$ g/ml IW9, an HLA-B\*57:01-restricted HIV Gag peptide. All peptides used were >95% pure. (A) and (B) show HLA-E\*01:01 binding of KL9 and KF11, respectively.



**Supplementary Figure 2**

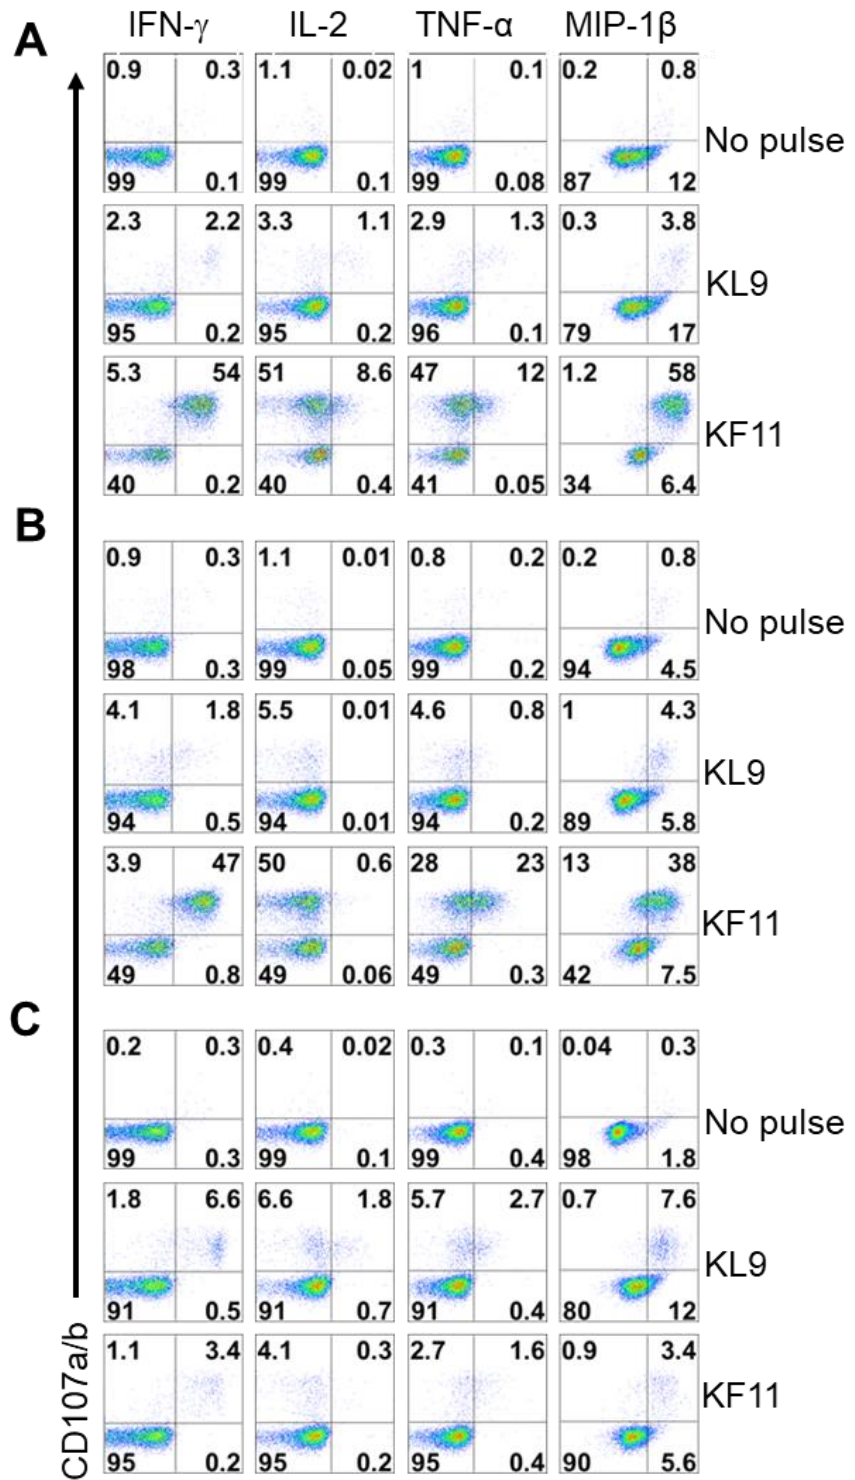

**Supplementary Figure 2. Polyfunctionality of KL9 specific CD8 T-cell responses elicited in chronically HIV infected individuals.** In-vitro cultured antigen specific CD8 T-cells from three HIV infected individuals were stimulated with KL9 peptide (10  $\mu$ g/ml loaded AEH cells for 5 hrs. in presence of anti-CD28/49d and golgi stop/plug. No peptide and Gag-KF11 peptide were used as negative and positive controls respectively. The production of IFN- $\gamma$ , IL-2, TNF- $\alpha$  and MIP-1 $\beta$  are shown.

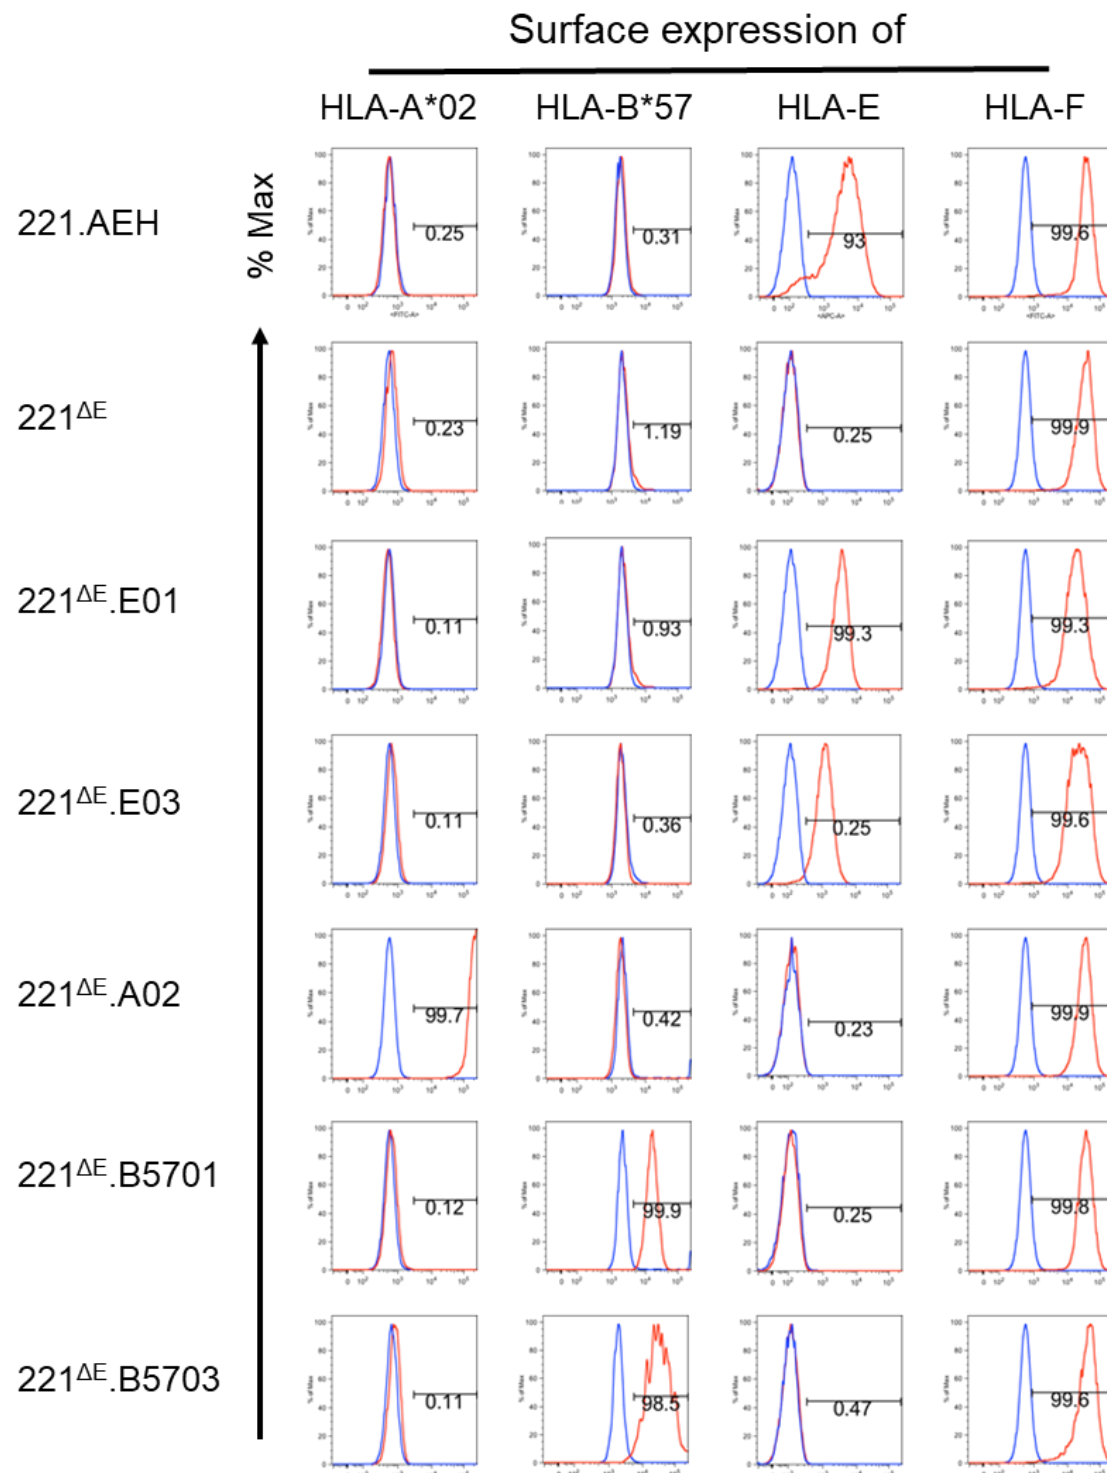

**Supplementary Figure 3. Expression of HLA class I alleles by 221<sup>ΔE</sup> and derivative single HLA-Ia or -Ib transductants.** Histograms showing the surface expression of HLA class I antigens (HLA-A\*02:01, HLA-B\*57, HLA-E\*01, and HLA-F) by immunostaining (red line) in each of the five single allele expressing derivatives of 221<sup>ΔE</sup> cell line. Isotype-matched mAbs were used as negative controls in these assays (blue line).

# Supplementary Figure 4

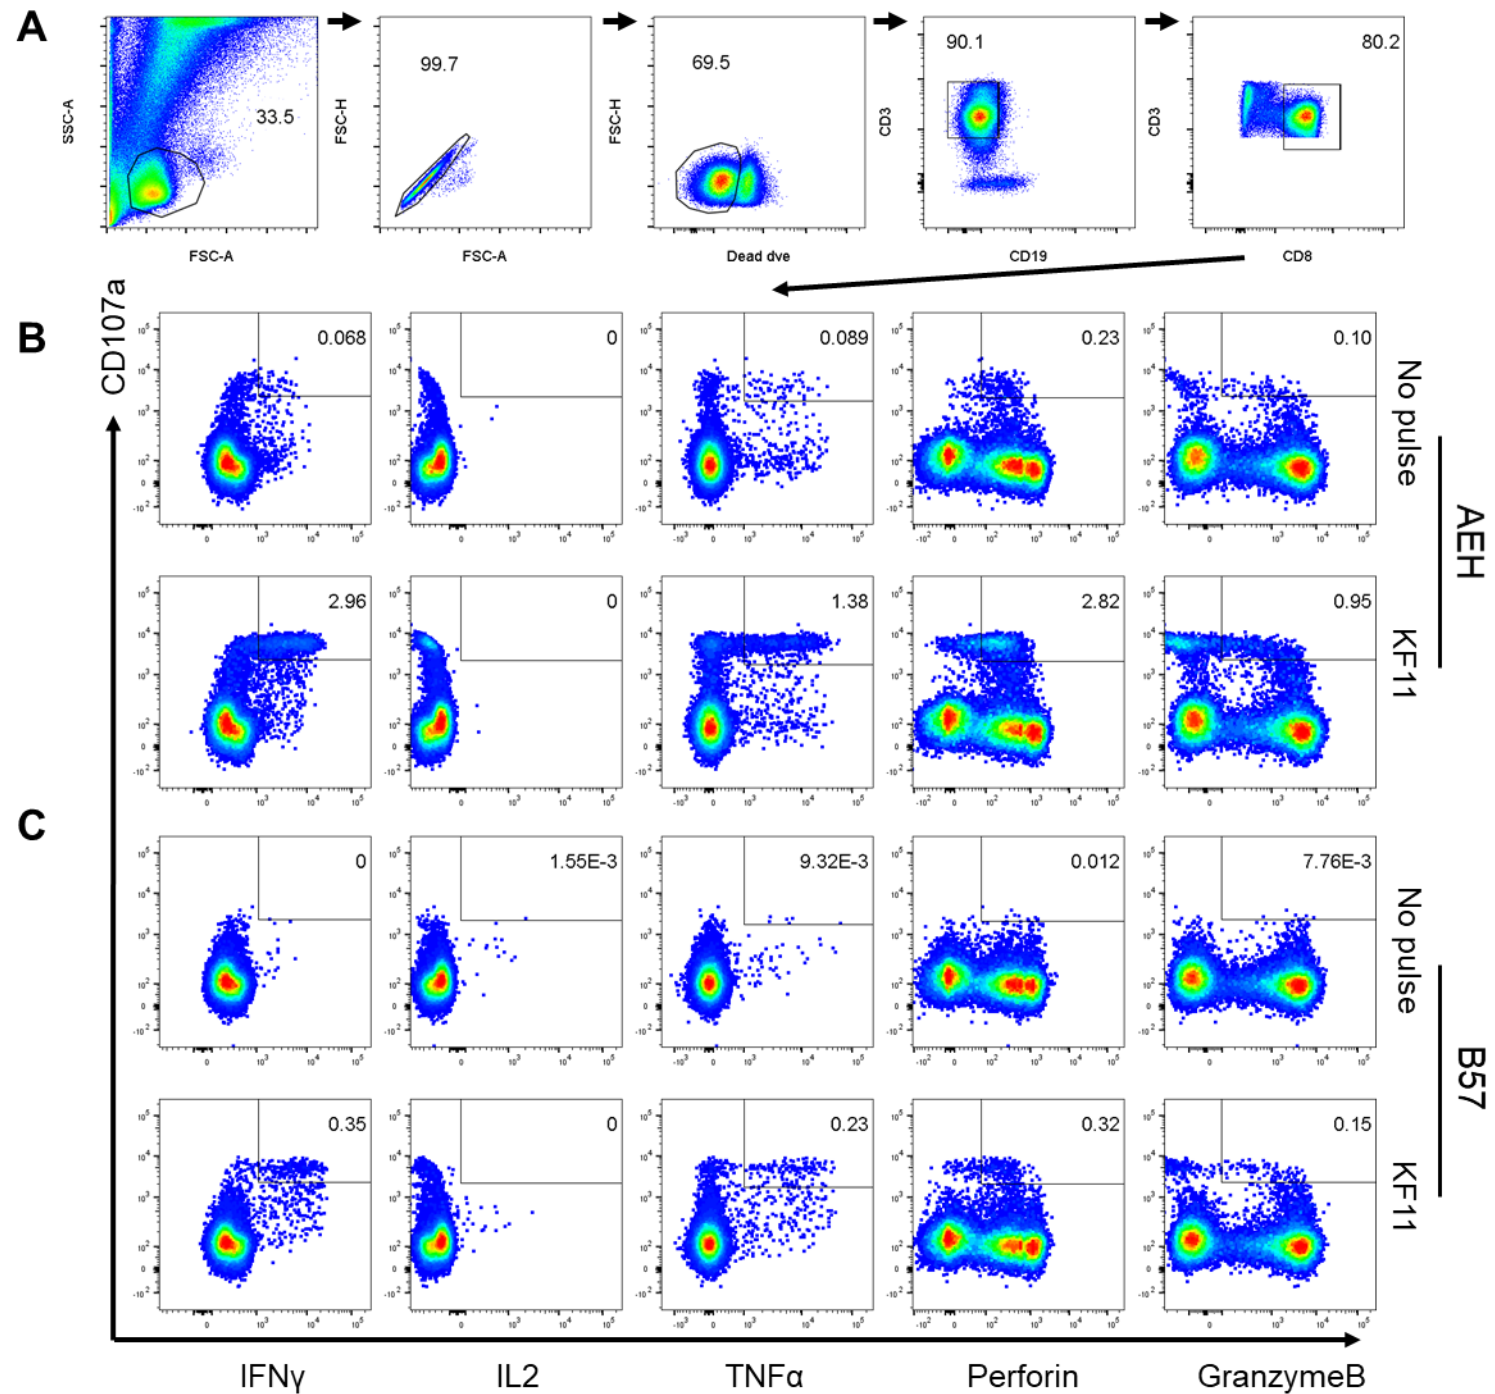

**Supplementary Figure 4. Representative gating strategy for measuring functionality of KF11 specific CD8 T-cell responses restricted by HLA-E and B\*57 in an ex-vivo assay.** (A) Top most panel shows representative gating strategy. Dual production of CD107a and either IFN- $\gamma$ , IL2, TNF- $\alpha$ , perforin and granzyme B is shown for CD8 T cells recognizing KF11 presented by 221.AEH (B) or K562-B\*57 targets (C). In both B and C, expression of cytokines/effector molecules are shown relative to negative control with no peptide pulse.

**Supplementary Figure 5**

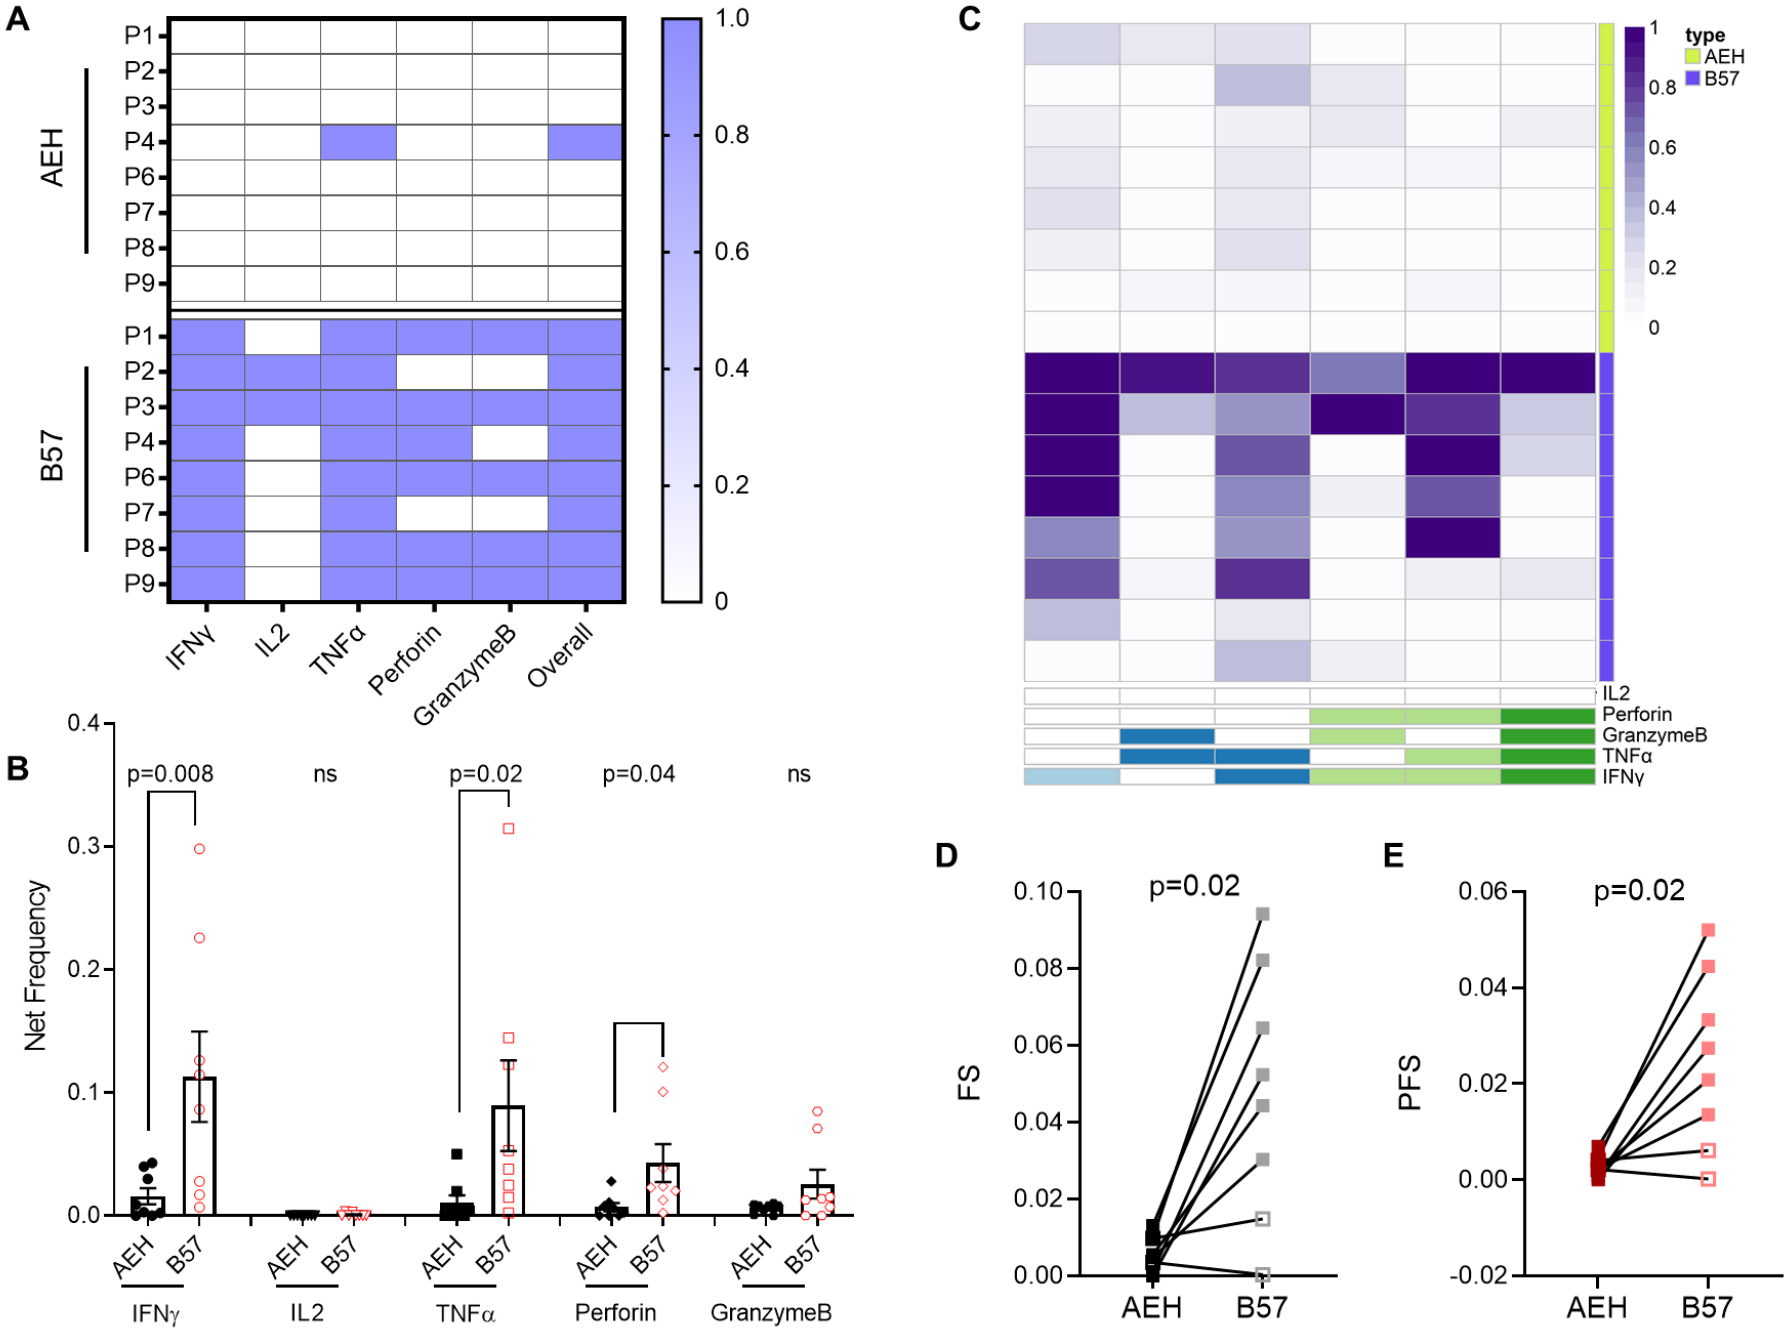

**Supplementary Figure 5. Ex-vivo ICS based polyfunctional profile comparison of KL9 specific responses restricted by HLA-B\*57 versus HLA-E in chronically HIV infected individuals. (A)** Heatmap showing the KL9 response restricted by HLA-E or B57 in each of the nine individuals tested (positive response was assigned with value of 1, negative response was assigned with value of 0). **(B)** The net frequency of cytokine/effector molecules production by CD8 T cells responding to KL9 presented by AEH cell line and K562.B57 cell line is shown. Net frequency was calculated by subtracting the no peptide pulsed control of the identical APC. **(C)** Heatmap of COMPASS functional analysis is shown. Data for functional score (FS) and polyfunctional score (PFS) are shown in panels **(D)** and **(E)**. Error bars represent mean  $\pm$  SEM. Significant changes are indicated.

**Supplementary Figure 6**

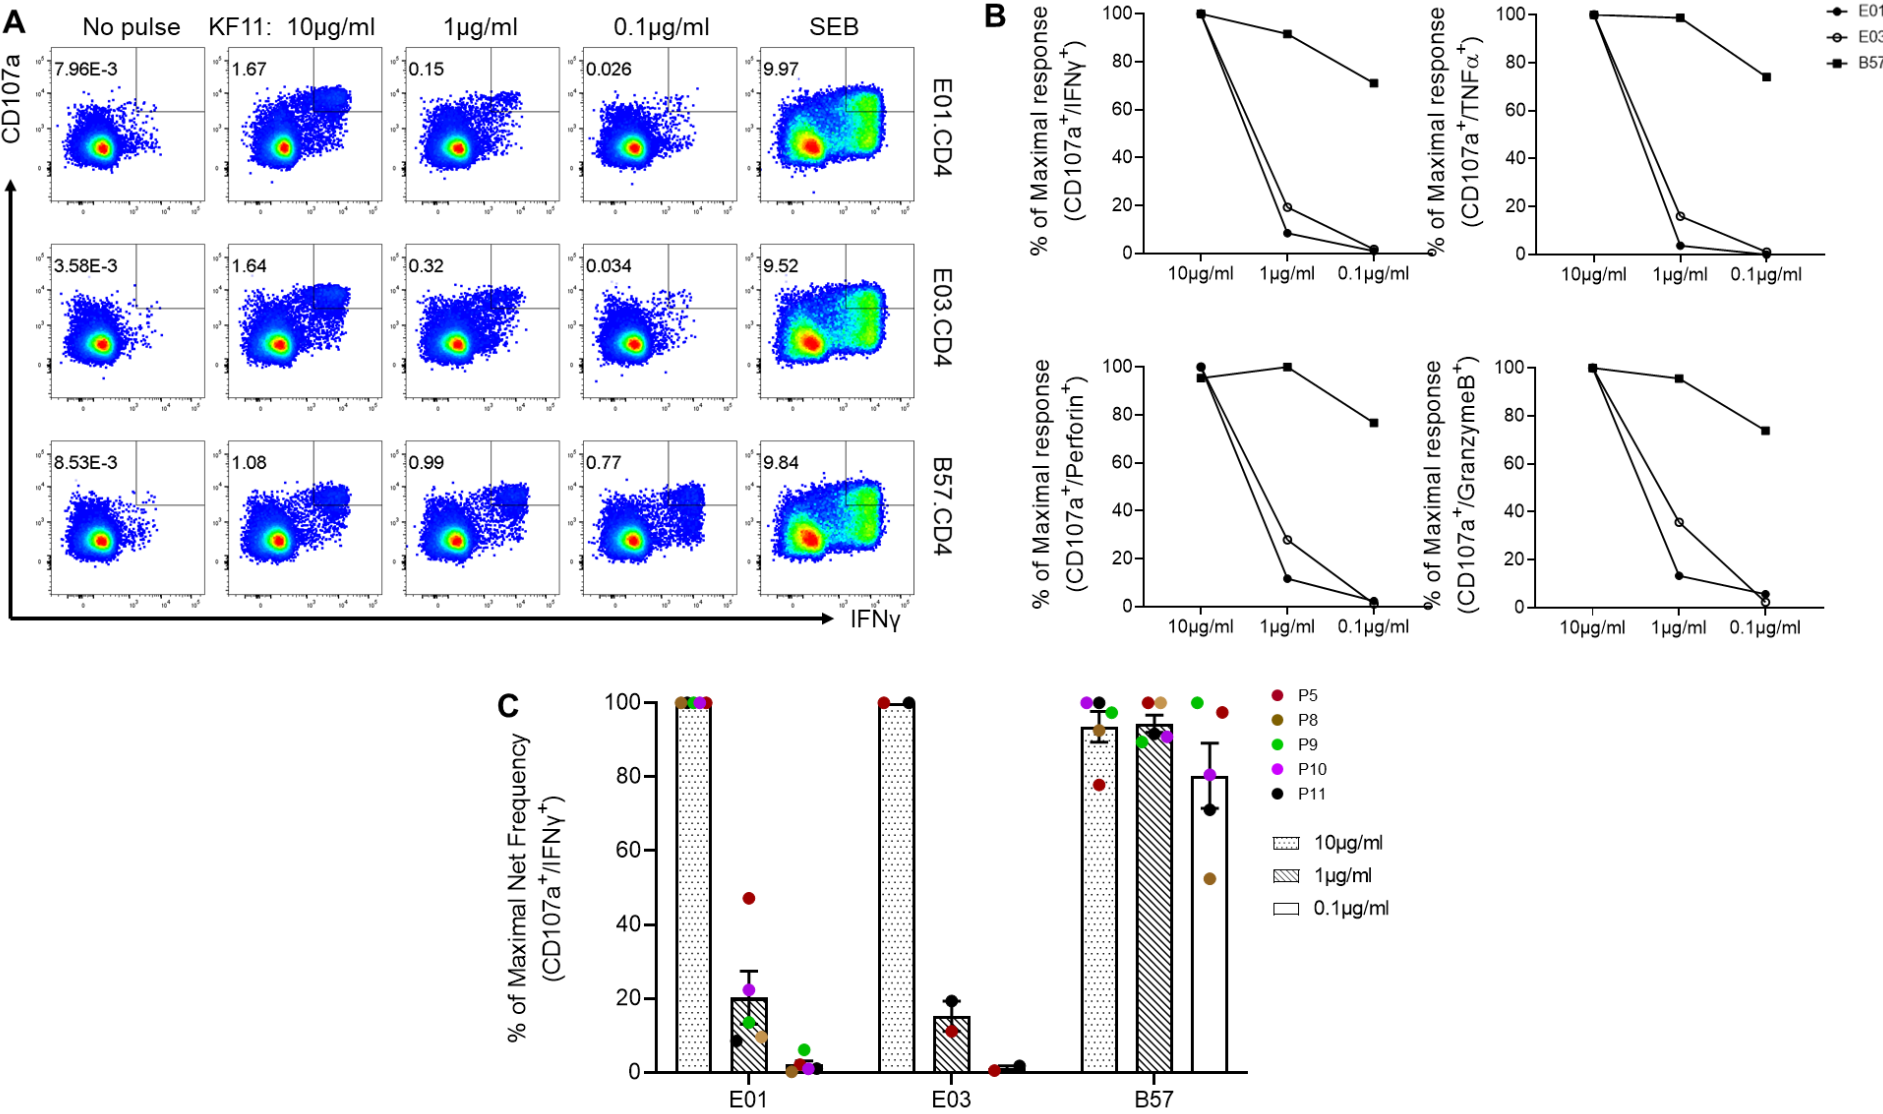

**Supplementary Figure 6. Antigen sensitivity of HLA-E and B57 restricted KF11 responses as measured by ex-vivo ICS assay. (A)** Representative flow plot showing dual CD107a/ IFN-γ production from CD8 T cells responding to stimulation by single HLA allele expressing APCs that were pulsed with KF11 at three log fold peptide dilutions in patient P11. Expression of cytokines/effector molecules are shown relative to negative control with no peptide pulse. CD8/APC co-cultures stimulated with SEB were used as positive controls. **(B)** Summary of antigen sensitivity data generated from P11 for multiple cytokine/effector molecules is shown. These data shown induction of dual production of CD107a and either IFN-γ, TNF-α, perforin and granzyme B when CD8 T cells respond to KF11 presented by E01, E03 or B57 targets. **(C)** Cumulative data on antigen sensitivity as measured by dual CD107a/ IFN-γ production in 5 chronically infected individuals is shown. Error bars represent mean ± SEM.

# Supplementary Figure 7

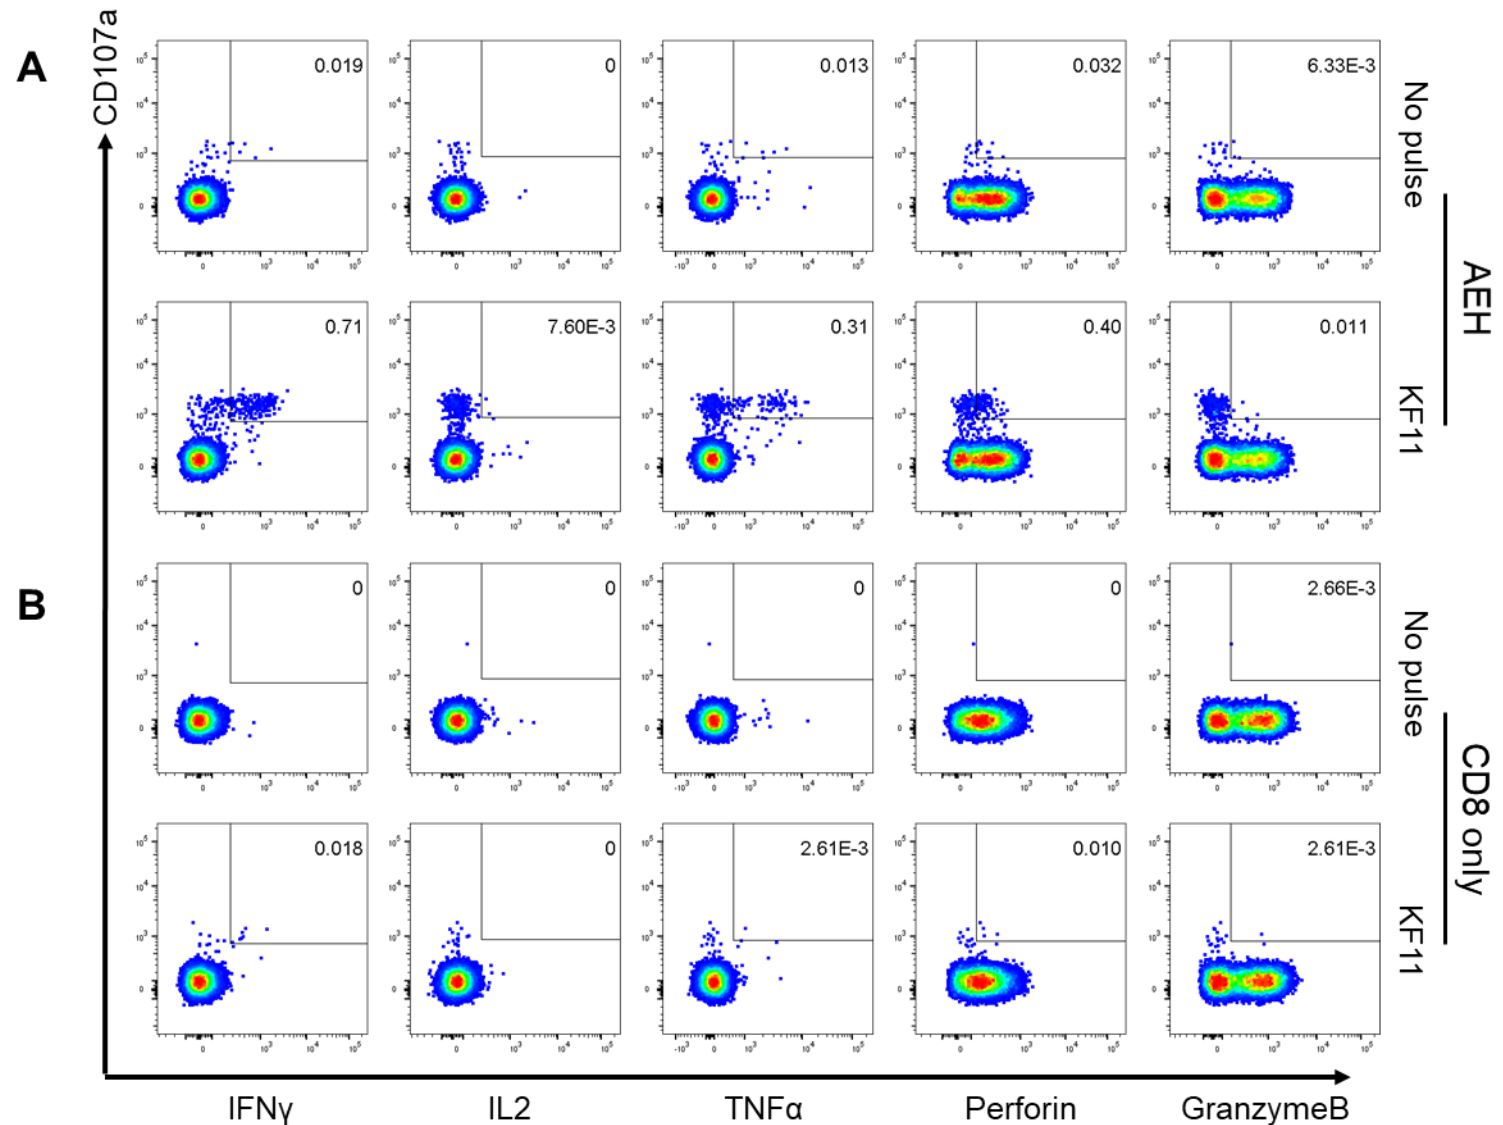

**Supplementary Figure 7. CD8 T cells are not activated via cross presentation.** Dual production of CD107a and either of IFN- $\gamma$ , IL2, TNF- $\alpha$ , perforin and granzyme B is shown for CD8 T cells relative to no peptide pulse under conditions of co-culturing with KF11 pulsed AEH target cells (**A**) or cultured in presence of KF11 peptide only (**B**) from a single HIV infected person.

## Supplementary Figure 8

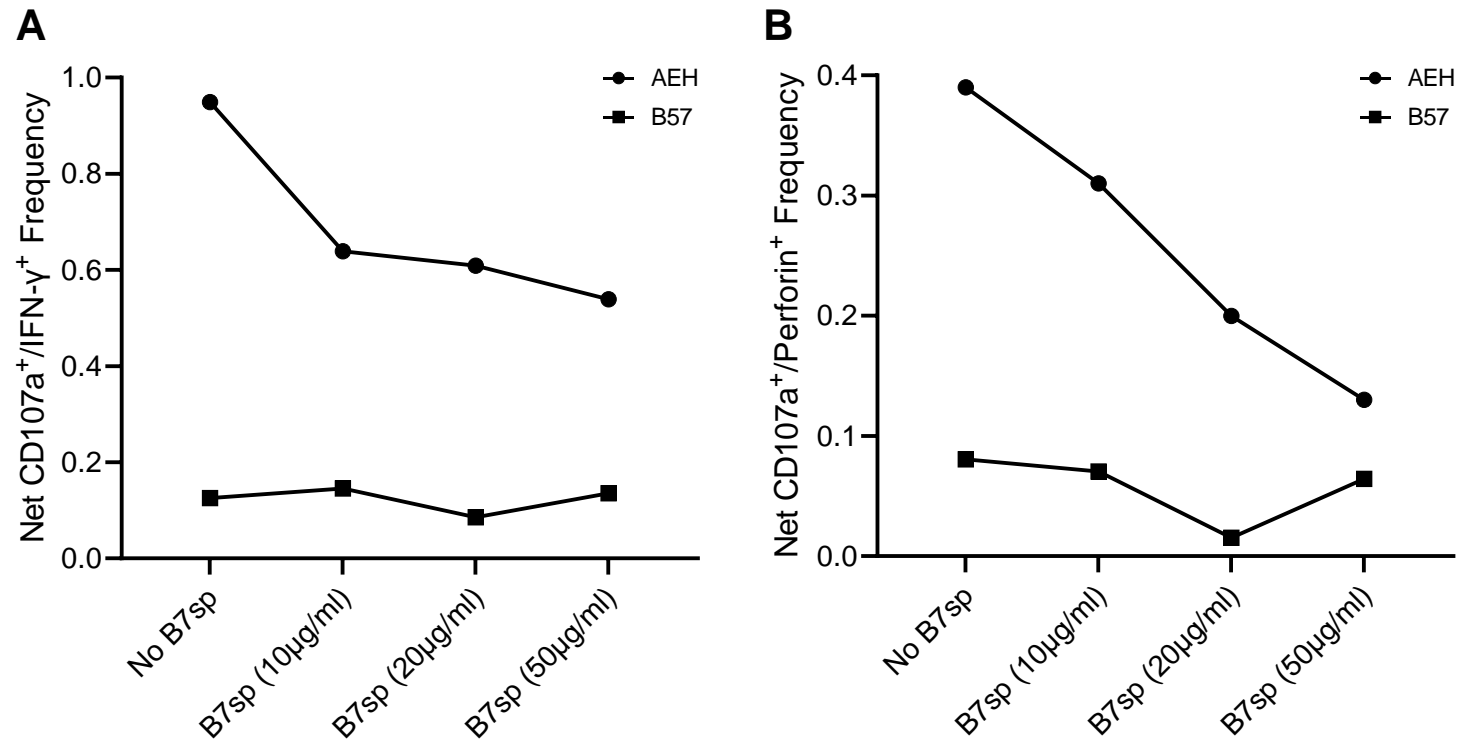

**Supplementary Figure 8. Blocking of HLA-E mediated KF11 presentation to antigen specific CD8 T cells by leader sequence derived B7 signal peptide.** CD8 T cells were positively isolated from PBMCs of a chronically HIV infected individual. HLA-E expressing AEH cells and HLA-B\*57 expressing K562.B57 cells that were pretreated with B7 signal peptide at three different concentrations (10, 20 and 50  $\mu$ g/ml) for 2 hrs. after which excess peptide was washed off. These cell lines were next pulsed with KF11 (10  $\mu$ g/ml) for 2 hrs. and then excess peptide washed off and these target cells co-cultured with CD8 T cells at 1:1 ratio for 12 hours. Net frequency of cytokine /effector molecule is shown (after subtracting the no peptide pulsed control using the identical APC). **(A)** CD107a/IFN- $\gamma$  and **(B)** CD107a/Perforin. Blocking of HLA-E mediated presentation is shown relative to that by an HLA-B\*57 expressing line.
